# Supplementary material for: Different network typologies in patenting activity of academic inventors through time: the case of Italian chemists in the period 2000–2011
Source: Springer Nature journal article supplement (doi:10.1186/s40604-016-0036-7), 2016-04-21
Supplement: MOESM1 [file 11901894]

## Multilingual abstracts: Arabic

Different network typologies in patenting activity of academic inventors through time: the case of Italian chemists in the period 2000-2011

**Saveria Capellari , Domenico De Stefano**

نماذج مختلفة من شبكة الاتصال في تسجيل براءات الاختراع لناشطين الأكاديميين المخترعين عبر الزمن: حالة الكيميائيين الإيطاليين في فترة 2000-2011

الكاتب (ة) : Saveria Capellari , Domenico De Stefano

### ملخص

نقدم في هذه الورقة نتائج لشبكة تحليلية طبقت على البيانات المتعلقة بالبراءات الأكاديمية في القطاع الفرعي للحقل الكيميائي في إيطاليا في الفترة 2000-2011. قمنا بتحليل التفاعلات على مستوى جزئي لتحديد الهياكل الموضوعية من قبل الجامعة المخترعة والجامعة المالكة لبراءات الاختراع. قمنا على وجه الخصوص بتحديد ثلاثة نماذج لشبكات فرعية (المسماة نوع أ، ب، ج) والتي تمثل مختلف الهياكل العلائقية النوعية، فضلا عن صفات مختلفة لحقوق الملكية. الصنف أ (العلوم المفتوحة) تمثل النموذج التقليدي للبراءات المملوكة؛ نوع ب (روابط متعددة) يمثل هيكل هجين مع العديد من الروابط ومشاركة الأكاديميين كأفراد والجامعات كالمؤسسات؛ نوع ج (قطع الشبكات) يمثل براءة اختراع نموذجية بدون دور الجامعات كمنظمات. يبدو ان الشبكة بكاملها تظهر نقطة انهيار من حيث الربط في حوالي سنة 2005، السنة التي تمثل تغييرا في ضوابط السياسة والتوجه الاستراتيجي للجامعات الإيطالية نحو تسجيل براءات الاختراع. بعد سنة 2005، ارتفع عدد الجهات الفاعلة بصفة غير متناسبة وظهرت تقطعات في الشبكة في عدة مكونات متقابلة. كما تغير تشكيل هاته الشبكات من حيث أنواع شبكات الاتصال الفرعية. يبدو أن الصورة العامة تؤكد على إجراء تغيير هيكلي كبير يهيمن عليه زيادة أهمية البراءات الأكاديمية سواء بطريقة مباشرة (الجامعة المالكة) او غير مباشرة (زيادة الأكاديمية في تسجيل براءات الاختراع).
